# Supplementary material
Source: publisher figshare collection journal article supplement (https://gsapubs.figshare.com/ndownloader/files/38231238)
Supplement: Supplementary file 1 [file 38231238]

Schwartz, T.M., Souders, A.K., Lundstern, J.E., Gilmer, A.K., and Thompson, R.A., 2022, Revised age and regional correlations of Cenozoic strata on Bat Mountain, Death Valley region, California (USA) from zircon U-Pb geochronology of sandstones and ash-fall tuffs: Geosphere, v. 19, <https://doi.org/10.1130/GES02543.1>.

**SUPPLEMENTAL INFORMATION FOR:**

**REVISED AGE AND REGIONAL CORRELATIONS OF CENOZOIC STRATA ON BAT MOUNTAIN, DEATH VALLEY REGION, CALIFORNIA FROM ZIRCON U-PB GEOCHRONOLOGY OF SANDSTONES AND ASH-FALL TUFFS**

Theresa M. Schwartz1, Amanda K. Souders2, Jens-Erik Lund Snee1, Amy K. Gilmer1, Ren A. Thompson1

1U.S. Geological Survey; Geoscience and Environmental Change Science Center; Denver, CO

2U.S. Geological Survey; Geology, Geophysics, and Geochemistry Science Center; Denver, CO

**Materials included in the Supplemental Information:**

1. Table S1. New zircon U-Pb data for tuffs of the Amargosa Valley and Bat Mountain Formations exposed on Bat Mountain in the southern Funeral Mountains, California (Schwartz and Souders, 2022).
2. Table S2. New detrital zircon U-Pb data for sandstones of the Amargosa Valley and Bat Mountain Formations exposed on Bat Mountain in the southern Funeral Mountains, California (Schwartz and Souders, 2022).
3. References for Supplemental Information.

**References:**

Midttun, N., 2022, Timing, rates, and styles of Cenozoic tectonism in the Basin and Range and Lesser Caucasus: Linking observations of intracontinental deformation to geodynamic processes [PhD thesis]: Ann Arbor, Michigan, University of Michigan, 230 p.

Miller, E.L., Raftrey, M.E., and Lund Snee, J.-E., 2021, Downhill from Austin and Ely to Las Vegas: U-Pb detrital zircon suites from the Eocene-Oligocene Titus Canyon Formation and associated strata, Death Valley, California, *in* Craddock, J.P., Malone, D.H., Foreman, B.Z., and Konstantinou, A., eds., Tectonic Evolution of the Sevier-Laramide Hinterland, Thrust Belt, and Foreland, and Postorogenic Slab Rollback (180-20 Ma): GSA Special Paper 555, doi: 10/1130/2021.2555(14).

Niemi, N.A., 2012, Detrital zircon age distributions as a discriminator of tectonic versus fluvial transport: An example from the Death Valley, USA, extended terrane: Geosphere, v. 9, no. 1, p. 126-137.

Schwartz, T.M. and Souders, A.K., 2022, Zircon U-Pb data for tuffs and sandstones of the Cenozoic Amargosa Valley and Bat Mountain Formations exposed on Bat Mountain, southern Funeral Mountains, California, USA: U.S. Geological Survey Data Release, <https://doi.org/10.5066/P982KK4D>.

Vermeesch, P., 2018, IsoplotR: a free and open toolbox for geochronology: Geoscience Frontiers, v. 9, p. 1479-1493.
